# Supplementary material for: CHAC1 overexpression in human gastric parietal cells with Helicobacter pylori infection in the secretory canaliculi
Source: PubMed Central journal article supplement (PMC6618068; doi:10.1111/hel.12598), 2019-05-20
Supplement: HEL-24-na-s001.pdf [file HEL-24-na-s001.pdf]

## **Supplementary Information**

### **CHAC1 overexpression in human gastric parietal cells with *Helicobacter pylori* infection in the secretory canaliculi**

Tomohisa Ogawa<sup>¶</sup>, Yuriko Wada<sup>¶</sup>, Kosuke Takemura, Philip G Board,  
Keisuke Uchida, Keisuke Kitagaki, Tomoki Tamura, Takashige Suzuki,  
Yutaka Tokairin, Yasuaki Nakajima & Yoshinobu Eishi\*

**Supplementary Table 1** Clinical profiles of patients with esophageal cancer from

whom fresh and formalin-fixed tissues of the gastric mucosa were obtained.

| Patient no.                         | Age | Gender | Histologic diagnosis                                | <i>H. pylori</i> |               |                  |
|-------------------------------------|-----|--------|-----------------------------------------------------|------------------|---------------|------------------|
|                                     |     |        |                                                     | IHC              | real-time PCR | serum IgG [U/ml] |
| <i>H. pylori</i> -positive patients |     |        |                                                     |                  |               |                  |
| 1                                   | 66  | M      | Squamous cell carcinoma of the esophagus            | +                | 39211         | 29               |
| 2                                   | 73  | M      | Squamous cell carcinoma of the esophagus            | +                | 28000         | 34               |
| 3                                   | 67  | M      | Adenocarcinoma in the Barrett esophagus             | +                | 23510         | 14               |
| 4                                   | 66  | F      | Squamous cell carcinoma of the esophagus            | +                | 12716         | 5                |
| 5                                   | 69  | M      | Squamous cell carcinoma of the esophagus            | +                | 6913          | 37               |
| 6                                   | 63  | M      | Squamous cell carcinoma of the esophagus            | +                | 5569          | 83               |
| 7                                   | 68  | M      | Squamous cell carcinoma of the esophagus            | +                | 5040          | N.E.             |
| 8                                   | 59  | F      | Squamous cell carcinoma of the esophagus            | +                | 3506          | 8                |
| 9                                   | 73  | M      | Squamous cell carcinoma of the esophagus            | +                | 1237          | 17               |
| 10                                  | 74  | M      | Squamous cell carcinoma of the esophagus            | +                | 170           | 41               |
| 11                                  | 64  | M      | Squamous cell carcinoma of the esophagus            | +                | 117           | 15               |
| 12                                  | 70  | M      | Squamous cell carcinoma of the esophagus            | +                | 110           | < 3              |
| 13                                  | 73  | M      | Adenocarcinoma at the esophagogastric junction      | +                | 107           | N.E.             |
| 14                                  | 67  | M      | Squamous cell carcinoma of the esophagus            | +                | 85            | 49               |
| 15                                  | 62  | M      | Squamous cell carcinoma of the esophagus            | +                | 30            | 20               |
| 16                                  | 69  | M      | Adenocarcinoma at the esophagogastric junction      | +                | 27            | < 3              |
| 17                                  | 65  | F      | No carcinoma, remaining in the operative material   | +                | 7             | < 3              |
| <i>H. pylori</i> -negative patients |     |        |                                                     |                  |               |                  |
| 18                                  | 76  | M      | Squamous cell carcinoma of the esophagus            | -                | 0             | 7                |
| 19                                  | 57  | M      | Squamous cell carcinoma of the esophagus            | -                | 0             | 4                |
| 20                                  | 61  | M      | Squamous cell carcinoma of the esophagus            | -                | 0             | 4                |
| 21                                  | 51  | M      | Squamous cell carcinoma of the esophagus            | -                | 0             | < 3              |
| 22                                  | 58  | M      | Adenocarcinoma at the esophagogastric junction      | -                | 0             | < 3              |
| 23                                  | 74  | M      | Squamous cell carcinoma of the esophagus            | -                | 0             | < 3              |
| 24                                  | 71  | M      | Adenocarcinoma at the esophagogastric junction      | -                | 0             | < 3              |
| 25                                  | 62  | M      | Squamous cell carcinoma of the esophagus            | -                | 0             | < 3              |
| 26                                  | 60  | M      | Squamous cell carcinoma of the esophagus            | -                | 0             | < 3              |
| 27                                  | 71  | F      | Squamous cell carcinoma of the esophagus            | -                | 0             | < 3              |
| 28                                  | 73  | M      | Squamous cell carcinoma of the esophagus            | -                | 0             | < 3              |
| 29                                  | 57  | M      | Multiple Squamous cell carcinoma of the esophagus   | -                | 0             | < 3              |
| 30                                  | 49  | M      | Squamous cell carcinoma of the esophagus            | -                | 0             | < 3              |
| 31                                  | 61  | M      | Multiple Squamous cell carcinoma of the esophagus   | -                | 0             | N.E.             |
| 32                                  | 68  | M      | Adenocarcinoma at the esophagogastric junction      | -                | 0             | N.E.             |
| 33                                  | 78  | M      | Squamous cell carcinoma of the esophagus            | -                | 0             | N.E.             |
| 34                                  | 52  | M      | Squamous cell carcinoma of the esophagus            | -                | 0             | N.E.             |
| 35                                  | 74  | M      | Squamous cell carcinoma of the esophagus            | -                | 0             | N.E.             |
| 36                                  | 55  | M      | No malignancy in the examined specimen of esophagus | -                | 0             | N.E.             |
| 37                                  | 70  | M      | Adenocarcinoma at the esophagogastric junction      | -                | 0             | N.E.             |
| 38                                  | 57  | F      | Squamous cell carcinoma of the esophagus            | -                | 0             | N.E.             |
| 39                                  | 54  | M      | Adenocarcinoma at the esophagogastric junction      | -                | 0             | N.E.             |
| 40                                  | 62  | M      | Squamous cell carcinoma of the esophagus            | -                | 0             | N.E.             |
| 41                                  | 53  | M      | Squamous cell carcinoma of the esophagus            | -                | 0             | N.E.             |

The enzyme IHC results for *H. pylori* were considered positive when any positive signals were identified in the mucous layers or lamina propria of the gastric mucosa.

The real-time PCR number is shown as the total number of *H. pylori* in the sample.

N.E.: not examined.

**Supplementary Table 2** Primers and probes used in this study

| Primers                                                         | Orientation | Sequence (5' – 3')                         |
|-----------------------------------------------------------------|-------------|--------------------------------------------|
| human <i>CHAC1</i>                                              | Sense       | GGTGACGCTCCTTGAAGATCAT                     |
|                                                                 | Antisense   | TCAGTGGTTGGTCAGGAGCAT                      |
|                                                                 | Probe       | [FAM]-AGAGGCAGTGCTTGGTGGCTACGATACC-[TAMRA] |
| 16S rRNA of <i>H. pylori</i>                                    | Sense       | GGGCTTA GTCTCTCCAGTAATGCA                  |
|                                                                 | Antisense   | GAGTTTTA ATCTTGCGACCGTACTC                 |
|                                                                 | Probe       | [FAM]-CTAACGCATTAAGCATCCCGCCTGG-[TAMRA]    |
| human $\beta$ -actin                                            | Sense       | GGATGCAGAAGGAGATCACTG                      |
|                                                                 | Antisense   | CGATCCACACGGAGTACTTG                       |
|                                                                 | Probe       | [TET]-CCCTGGCACCCAGCACAATG-[TAMRA]         |
| human <i>proton pump/H,K-ATPase <math>\alpha</math> subunit</i> | Sense       | CAACTTTGCCTCCAT                            |
|                                                                 | Antisense   | TGGAGCAGGGTCGACTGATCTTCGA                  |
|                                                                 | Probe       | [FAM]-TGAAGAAGTCTATTGCCTACACATTGA-[TAMRA]  |
